# Supplementary material for: Serum IgG galactosylation as a potential biomarker for the diagnosis of echinococcosis
Source: Royal Society of Chemistry journal article supplement (doi:10.1039/d4an01578a), 2025-01-01
Supplement: d4an01578a1.pdf [file d4an01578a1.pdf]

## **Serum IgG galactosylation as a potential biomarker for diagnosis of echinococcosis**

Zhuoer Lu,<sup>a</sup> Xiaoxiao Feng,<sup>b</sup> Bin Fu,<sup>a</sup> Xiaojin Mo,<sup>c</sup> Ting Zhang,<sup>c</sup> Liming Wei,<sup>\*b</sup> Zhonghua Li<sup>\*a,d</sup>  
and Haojie Lu<sup>a,d</sup>

<sup>a</sup> Department of Chemistry & Department of Biochemistry and Molecular Biology, School of Basic Medical Sciences, Fudan University, Shanghai 200032, People's Republic of China

<sup>b</sup> The Fifth People's Hospital of Shanghai & Institutes of Biomedical Sciences, Fudan University, Shanghai 200032, People's Republic of China

<sup>c</sup> National Institute of Parasitic Diseases, Chinese Center for Disease Control and Prevention (Chinese Center for Tropical Diseases Research), Shanghai 200025, People's Republic of China

<sup>d</sup> NHC Key Laboratory of Glycoconjugates Research, Fudan University, Shanghai 200032, People's Republic of China

\*Corresponding authors.

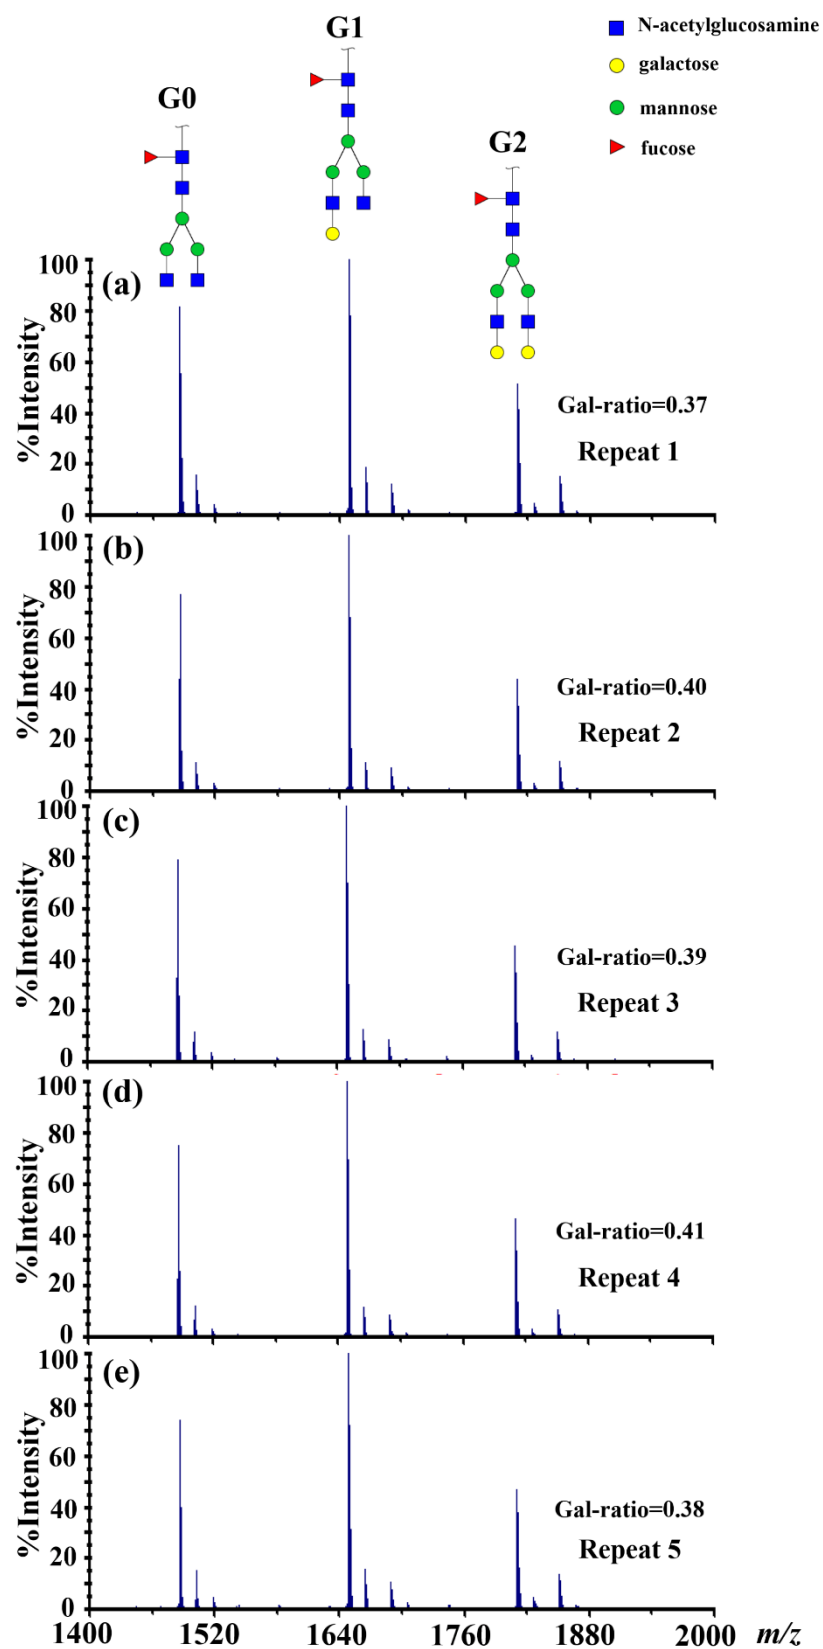

**Figure S1.** Five replicate MALDI-TOF-MS spectra of the same sample.

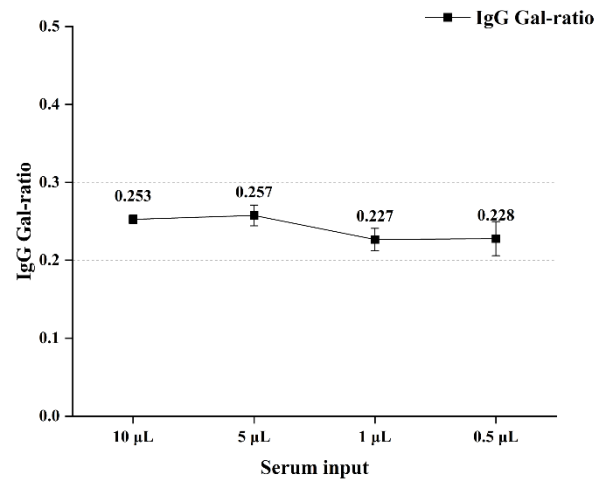

**Figure S2.** The IgG Gal-ratios of different serum inputs.

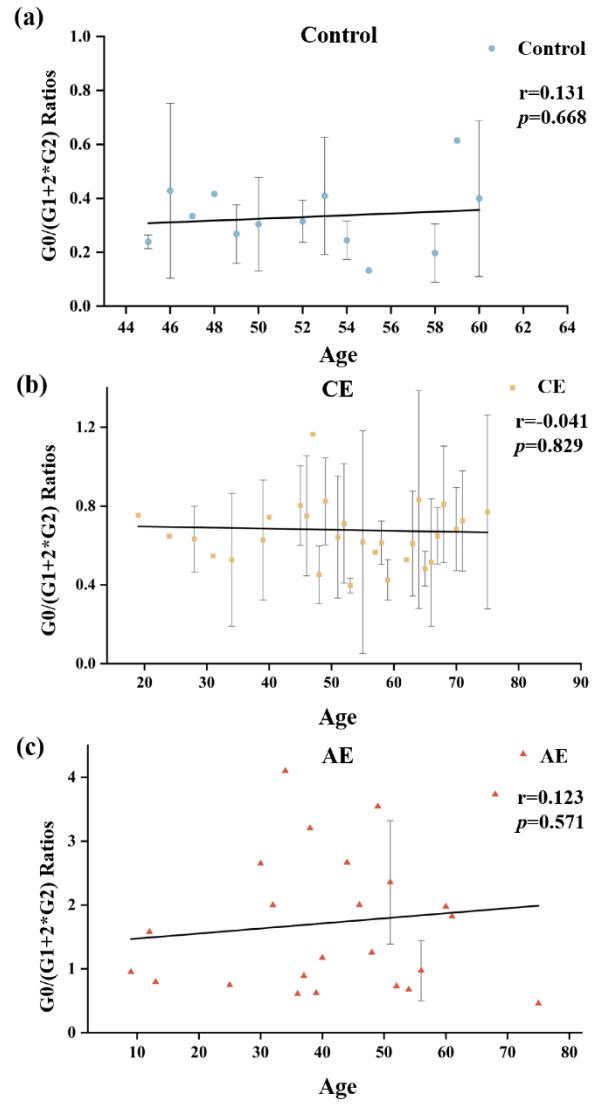

**Figure S3.** The relationship between IgG Gal-ratio and age. The relationship between IgG Gal-ratio and age in control (a), CE (b) and AE (c) patients. Error bars represent SEM of IgG Gal-ratios of the samples at the same age.

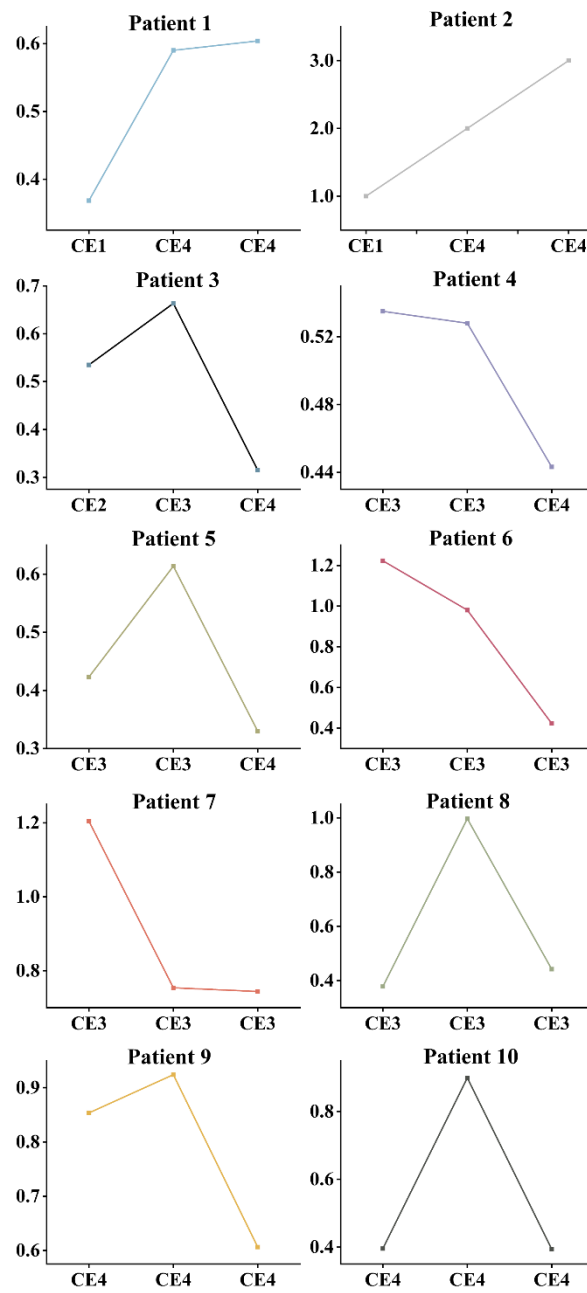

**Figure S4.** Dynamic changes of IgG Gal-ratio with the progression of CE in follow-up patients over three years.
