# Supplementary material for: Serum IgG galactosylation as a potential biomarker for the diagnosis of echinococcosis
Source: Royal Society of Chemistry journal article supplement (doi:10.1039/d4an01578a), 2025-01-01
Supplement: d4an01578a2.xlsx [file d4an01578a2.xlsx]

## Sheet: Sheet1
Supplementary Information
Serum IgG galactosylation as a potential biomarker for diagnosis of echinococcosis
Zhuoer Lu, a Xiaoxiao Feng, b Bin Fu, a Xiaojin Mo, c Ting Zhang, c Liming Wei,*b Zhonghua Li*a,d and Haojie Lu a,d
a Department of Chemistry & Department of Biochemistry and Molecular Biology, School of Basic Medical Sciences, Fudan University, Shanghai 200032, People’s Republic of China
b The Fifth People’s Hospital of Shanghai & Institutes of Biomedical Sciences, Fudan University, Shanghai 200032, People’s Republic of China
c National Institute of Parasitic Diseases, Chinese Center for Disease Control and Prevention (Chinese Center for Tropical Diseases Research), Shanghai 200025, People’s Republic of China
d NHC Key Laboratory of Glycoconjugates Research, Fudan University, Shanghai 200032, People’s Republic of China
*Corresponding authors.
Supplementary Tables
Table S1. Clinical aspects of participants and their numbering of the raw data.
Table S2. Altered IgG Gal-ratios of healthy control, CE and AE patients.
Table S3 Altered IgG Gal-ratios of patients with different CE subtypes.
Table S4. Altered IgG Gal-ratios of AE and HCC patients.

## Sheet: Table S1
Clinical aspects of participants and their numbering of the raw data
Category	Stage	Raw	Number	Gender（0 female）	age
CE1	CE1-1	A1	1	0	71
	CE1-2	A2	2	0	71
	CE1-3	A3	3	0	71
	CE1-4	A4	4	0	71
	CE1-5	A5	5	0	47
	CE1-6	A6	6	0	51
	CE1-7	A7	7	0	65
	CE1-8	A8	8	1	66
	CE1-9	A9	9	0	71
	CE1-10	A10	10	0	65
	CE1-11	A11	11	1	63
	CE1-12	A12	12	0	39
	CE1-13	A13	13	0	50
	CE1-14	A14	14	0	66
	CE1-15	A15	15	0	51
	CE1-16	A16	16	0	66
	CE1-17	A17	17	0	24
	CE1-18	A18	18	1	57
	CE1-19	A19	19	0	28
	CE1-20	A20	20	0	55
	CE1-21	A21	21	0	28
	CE1-22	A22	22	0	55
CE2	CE2-1	B1	23	1	63
	CE2-2	B2	24	1	46
	CE2-3	B3	25	1	46
	CE2-4	B4	26	1	75
	CE2-5	B5	27	0	31
	CE2-6	B6	28	1	19
	CE2-7	A23	29	1	62
	CE2-8	A24	30	1	63
CE3a	CE3-1	B7	31	0	40
	CE3-2	B8	32	1	67
	CE3-3	B9	33	0	67
	CE3-4	B10	34	0	67
	CE3-5	B11	35	0	67
	CE3-6	B12	36	0	68
	CE3-7	B13	37	1	53
	CE3-8	B14	38	1	59
	CE3-9	B15	39	1	67
CE3b	CE3-10	C1	40	0	68
	CE3-11	C2	41	0	52
	CE3-12	C3	42	0	49
	CE3-13	C4	43	0	48
	CE3-14	C5	44	0	64
	CE3-15	C6	45	0	49
	CE3-16	C7	46	1	53
	CE3-17	C8	47	1	71
	CE3-18	C9	48	1	71
	CE3-19	C10	49	1	71
	CE3-20	C11	50	1	63
	CE3-21	C12	51	1	58
	CE3-22	C13	52	1	51
	CE3-23	C14	53	0	66
	CE3-24	C15	54	1	75
	CE3-25	B16	55	1	48
	CE3-26	B17	56	0	70
	CE3-27	B18	57	0	64
	CE3-28	B19	58	1	65
	CE3-29	B20	59	1	65
	CE3-30	B21	60	1	58
	CE3-31	B22	61	0	66
	CE3-32	B23	62	0	70
	CE3-33	B24	63	1	63
CE4	CE4-1	D1	64	0	39
	CE4-2	D2	65	0	39
	CE4-3	D3	66	0	39
	CE4-4	D4	67	0	48
	CE4-5	D5	68	0	52
	CE4-6	D6	69	0	48
	CE4-7	D7	70	1	63
	CE4-8	D8	71	1	63
	CE4-9	D9	72	0	68
	CE4-10	D10	73	1	66
	CE4-11	D11	74	1	45
	CE4-12	D12	75	1	63
	CE4-13	D13	76	1	45
	CE4-14	D14	77	0	58
	CE4-16	C16	79	1	66
	CE4-17	D16	80	1	51
	CE4-18	C17	81	1	59
	CE4-19	D17	82	1	45
	CE4-20	C18	83	0	66
	CE4-21	D18	84	1	59
	CE4-22	C19	85	1	75
	CE4-23	C20	86	1	63
	CE4-24	C21	87	1	63
	CE4-25	C22	88	1	67
	CE4-26	C23	89	0	58
	CE4-27	C24	90	0	58
CE5	CE5-1	E1	91	1	63
	CE5-2	E2	92	1	63
	CE5-3	E3	93	1	45
	CE5-4	E4	94	1	45
	CE5-5	E5	95	0	51
	CE5-7	D19	97	0	70
	CE5-8	D20	98	0	34
	CE5-9	D21	99	0	34
	CE5-10	D22	100	0	63
	CE5-11	D23	101	0	63
	CE5-12	D24	102	0	70
AE	AE-1	F1	103	0	52
	AE-2	F2	104	0	40
	AE-3	F3	105	1	36
	AE-4	F4	106	0	46
	AE-5	F5	107	1	48
	AE-6	F6	108	1	30
	AE-7	F7	109	1	13
	AE-8	F8	110	1	34
	AE-9	E8	111	1	60
	AE-10	E9	112	0	68
	AE-11	F9	113	1	38
	AE-12	F10	114	1	44
	AE-13	E10	115	0	61
	AE-14	F11	116	0	39
	AE-15	E11	117	0	51
	AE-16	E12	118	0	32
	AE-17	F12	119	0	51
	AE-18	E15	120	1	9
	AE-19	E16	121	1	49
	AE-20	E17	122	1	51
	AE-21	E18	123	1	25
	AE-22	E19	124	0	12
	AE-23	E20	125	1	56
	AE-24	E21	126	0	37
	AE-25	E22	127	0	75
	AE-26	E23	128	0	56
	AE-27	E24	129	1	54
Normal Control	N1	G1	133	0	50
	N2	G2	134	0	46
	N3	G3	135	1	59
	N4	G4	136	1	56
	N5	G5	137	0	47
	N6	G7	138	1	46
	N7	G8	139	0	48
	N8	G9	140	0	45
	N9	G10	141	0	49
	N10	G11	142	1	50
	N11	G12	143	1	60
	N12	F13	144	0	53
	N13	G13	145	0	49
	N14	F14	146	0	54
	N15	G14	147	1	58
	N16	G15	148	1	52
	N17	F15	149	1	58
	N18	G16	150	1	60
	N19	F16	151	1	53
	N20	G17	152	1	49
	N21	F17	153	0	54
	N22	G18	154	1	45
	N23	F18	155	1	58
	N24	F19	156	1	52
	N25	F20	157	1	58
	N26	F21	158	1	60
	N27	F22	159	1	53
	N28	F23	160	1	49
	N29	F24	161	0	54
HCC	HCC1	H1	163	1	65
	HCC2	H2	164	0	74
	HCC3	H3	165	1	54
	HCC4	H4	166	0	58
	HCC5	H5	167	1	68
	HCC6	H6	168	1	59
	HCC7	H7	169	1	30
	HCC8	H8	170	1	49
	HCC9	H9	171	1	40
	HCC10	H10	172	1	37
	HCC11	H11	173	1	38
	HCC12	H12	174	1	60
	HCC13	H13	175	1	40
	HCC14	H14	176	1	38
	HCC15	H15	177	1	44
	HCC16	H16	178	1	63
	HCC17	H17	179	1	47
	HCC18	H18	180	0	50
	HCC19	G19	181	1	64
	HCC20	H19	182	1	49
	HCC21	G20	183	1	72
	HCC22	H20	184	1	33
	HCC23	G21	185	1	37
	HCC24	H21	186	1	52
	HCC25	H22	187	1	68
	HCC26	G22	188	0	43
	HCC27	G23	189	0	50
	HCC28	G24	190	1	40
	HCC29	H24	191	0	54
	CE	AE	HCC	Normal control
Age (mean ± SEM)	56.9 ± 13.3	44.53 ± 16.3	52.9 ± 9.98	52.5 ± 4.91
Gender (male/female)	46/54	14/13	23/6	18/11

## Sheet: Table S2
Altered IgG Gal-ratios of healthy control, CE and AE patients
p(CE (n=100)_vs_Control (n=29))	p(AE (n=27)_vs_Control (n=29))	p(CE (n=100)_vs_AE (n=27))	p(AE (n=27)_vs_HCC (n=29))
<0.0001	<0.0001	<0.0001	<0.0001

## Sheet: Table S3
Altered IgG Gal-ratios of patients with different CE subtypes
p(CE1 (n=22)_vs_Control (n=29))	p(CE2 (n=8)_vs_Control (n=29))	p(CE3 (n=33)_vs_Control (n=29))	p(CE4&5 (n=37)_vs_Control (n=29))
<0.0001	0.00153	<0.0001	<0.0001

## Sheet: Table S4
Altered IgG Gal-ratios of AE and HCC patients
p(AE (n=27)_vs_HCC (n=29))
<0.0001
